# Supplementary figures and images for: Black phosphorus mediated photoporation: a broad absorption nanoplatform for intracellular delivery of macromolecules
Source: Royal Society of Chemistry journal article supplement (doi:10.1039/d1nr05461a), 2021-01-01

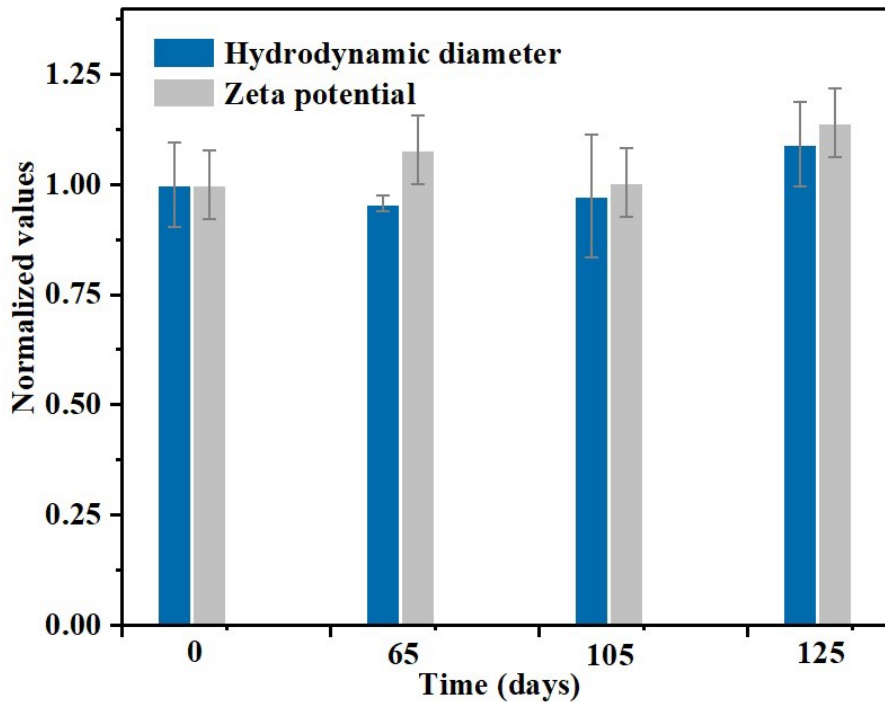

Supplement: d1nr05461a1.pdf [file d1nr05461a1.pdf]

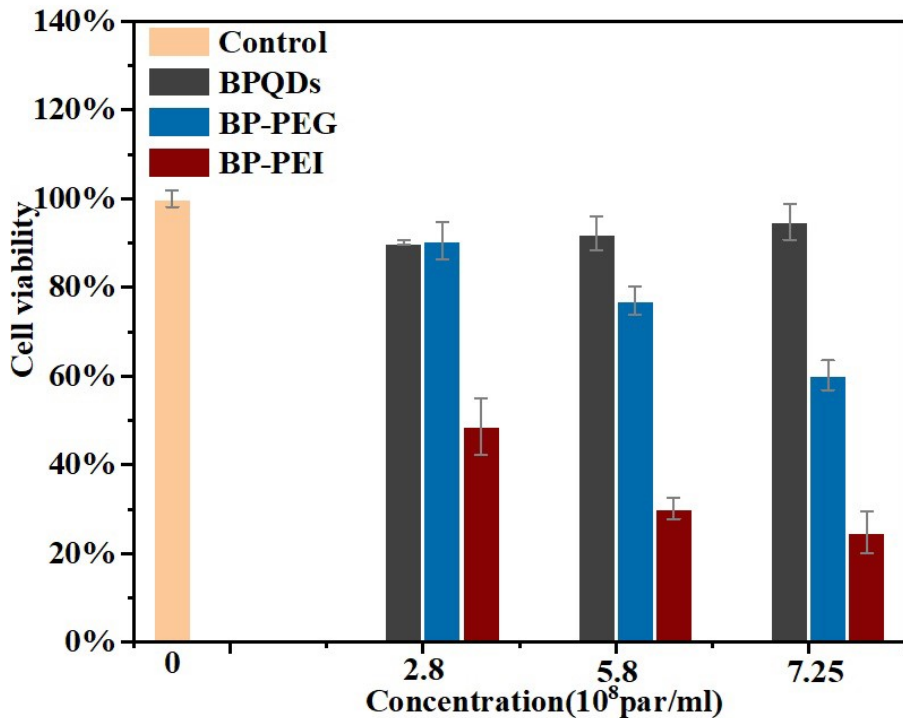

Supplement: d1nr05461a2.pdf [file d1nr05461a2.pdf]

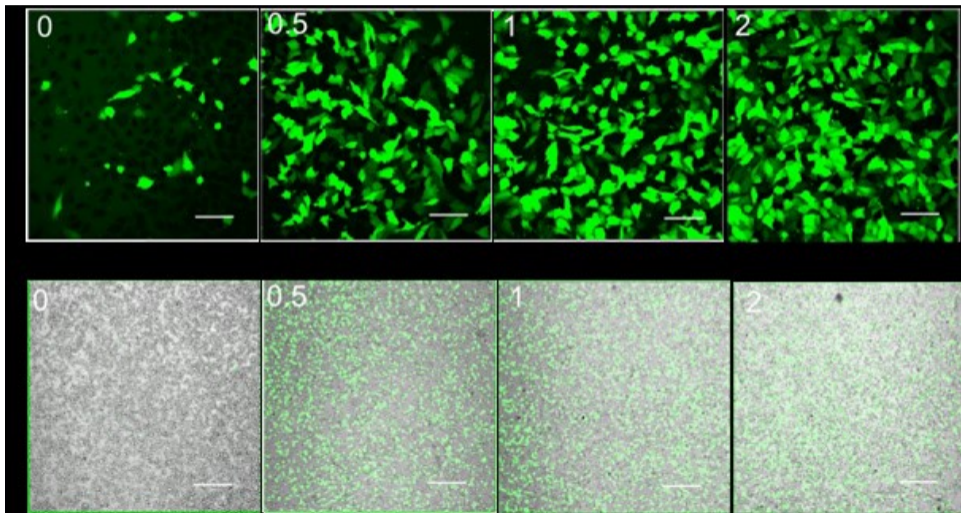

Supplement: d1nr05461a3.pdf [file d1nr05461a3.pdf]
